# Supplementary material
Source: Springer Nature journal article supplement (https://www.springermedizin.de/resource/supplementary/12891_2013_1970_MOESM2_ESM.pdf/9508924)

Mean PF6 'bending, kneeling, stooping'

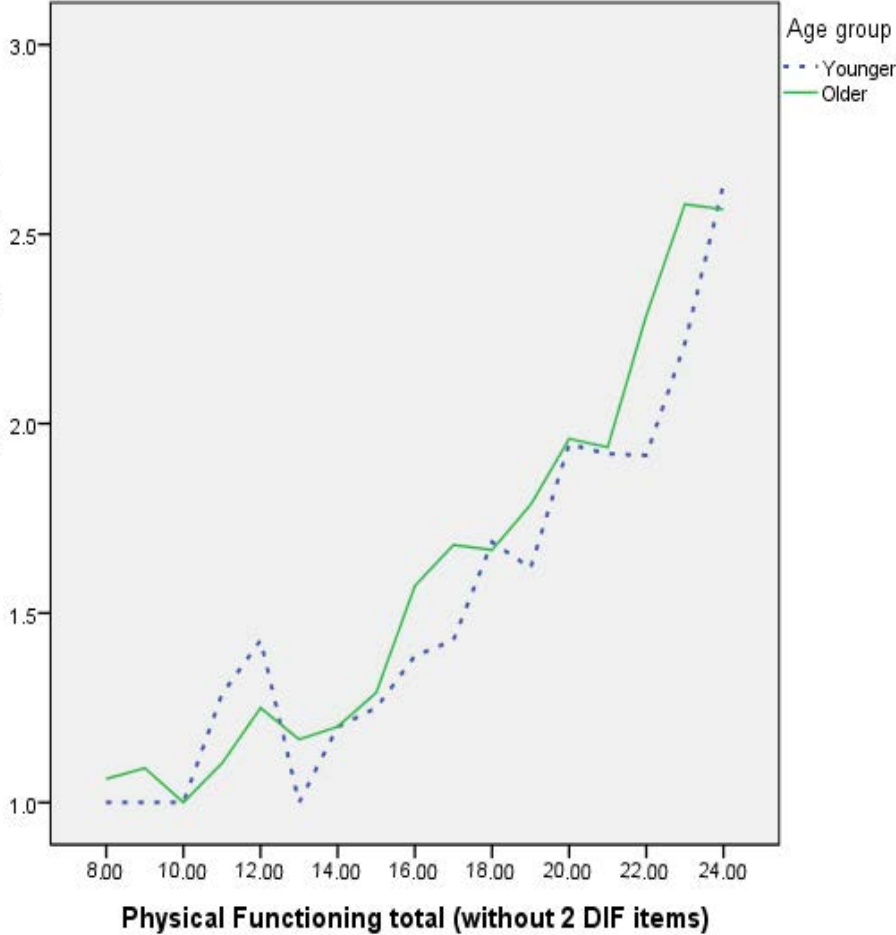

Supplement: MOESM2 [file 9508924]
